# Supplementary material for: Poly(acrylic acid) locally enriched in slurry enhances the electrochemical performance of the SiOx lithium-ion battery anode
Source: Royal Society of Chemistry journal article supplement (doi:10.1039/d2ta09840g), 2023-01-01
Supplement: d2ta09840g1.pdf [file d2ta09840g1.pdf]

## Supporting Information

### Poly (acrylic acid) Locally Enriched in Slurry Enhances

### Electrochemical Performance of the SiO<sub>x</sub> Lithium-Ion Battery Anode

Ming Yang<sup>a,b</sup>, Peng Chen<sup>c</sup>, Jiapei Li<sup>b,d</sup>, Ruoxuan Qi<sup>b,e</sup>, Yudai Huang<sup>d</sup>, Peter Müller-Buschbaum<sup>e,f</sup>, Ya-Jun Cheng<sup>\*b</sup>, Kunkun Guo<sup>\*c</sup> and Yonggao Xia<sup>\*b,g</sup>

## Content

|                                                                                                                                                                                                                                                                                                                                                  |    |
|--------------------------------------------------------------------------------------------------------------------------------------------------------------------------------------------------------------------------------------------------------------------------------------------------------------------------------------------------|----|
| Figure S1. Cycling performance of Li  SiO <sub>x</sub> cells at 0.5 C in the voltage range of 0.01 V - 1.5 V prepared with the slurries from water (PAA-H <sub>2</sub> O) or DMF (PAA-DMF) with the mass loading density of SiO <sub>x</sub> is 0.8 mg cm <sup>-2</sup> .....                                                                    | 4  |
| Figure S2. Cycling performance of Li  SiO <sub>x</sub> cells at 0.5 C in the voltage range of 0.01 V - 1.5 V prepared with the slurries from water (PAA-H <sub>2</sub> O) or DMF (PAA-DMF) with the lithium metal counter electrode is replaced after more than 100 cycles. ....                                                                 | 5  |
| Figure S3. Cycling performance of Li  SiO <sub>x</sub> cells at 0.5 C in the voltage range of 0.01 V - 1.5 V prepared with the slurries from water (PAA-H <sub>2</sub> O) or DMF (PAA-DMF) and the composition was 80:10:10 (SiO <sub>x</sub> : SP: PAA).....                                                                                    | 6  |
| Table S1. Discharge specific capacities of the SiO <sub>x</sub> /PAA-DMF and SiO <sub>x</sub> /PAA-H <sub>2</sub> O electrodes at different current densities (1 C = 1500 mA·g <sup>-1</sup> ). ....                                                                                                                                             | 7  |
| Figure S4. The differential capacity plot of the SiO <sub>x</sub> /PAA-H <sub>2</sub> O (a) and SiO <sub>x</sub> /PAA-DMF electrodes (b) Initial discharge/charge profiles of the SiO <sub>x</sub> /PAA-H <sub>2</sub> O and SiO <sub>x</sub> /PAA-DMF electrodes under the current density of 0.1 C (c).....                                    | 8  |
| Figure S5. Cycling performance (a) and rate capacity (b) of the Li  SiO <sub>x</sub> cells at 0.5 C in the voltage range of 0.01 V - 1.5 V with different volume ratios of H <sub>2</sub> O/DMF with the mass loading density of 1.4-1.6 mg cm <sup>-2</sup> with respect to SiO <sub>x</sub> . ....                                             | 9  |
| Figure S6. Cycling performance of Li  SiO <sub>x</sub> cells at 0.5 C in the voltage range of 0.01 V - 1.5 V prepared with the slurries from NMP (PAA-NMP) or DMF (PAA-DMF) (the mass loading density of SiO <sub>x</sub> is 1.4-1.6 mg cm <sup>-2</sup> ).....                                                                                  | 10 |
| Figure S7. Cycling performance of Li  SiO <sub>x</sub> cells at 0.5 C in the voltage range of 0.01 V - 1.5 V prepared with the slurries from the different molecular weights commercial aqueous PAA solutions or DMF/H <sub>2</sub> O mixed PAA solutions: commercial aqueous PAA solution-1 (a) and commercial aqueous PAA solution-2 (b). .... | 11 |
| Figure S8. Cycling performance of Li  SiO <sub>x</sub> /C cells at 0.5 C in the voltage range of 0.01 V - 1.5 V prepared with the slurries from water (PAA-H <sub>2</sub> O) or DMF (PAA-DMF) (1 C=450 mA g <sup>-1</sup> ) .....                                                                                                                | 12 |
| Figure S9. FTIR spectra of the PAA-H <sub>2</sub> O and PAA-DMF solution (a). FTIR spectra of                                                                                                                                                                                                                                                    |    |

|                                                                                                                                                                                                                                                                                                                                                                                 |    |
|---------------------------------------------------------------------------------------------------------------------------------------------------------------------------------------------------------------------------------------------------------------------------------------------------------------------------------------------------------------------------------|----|
| the SiO <sub>x</sub> /PAA powder collected after drying treatment of the SiO <sub>x</sub> -PAA-H <sub>2</sub> O and SiO <sub>x</sub> -PAA-DMF slurries (b). The shear rate dependent apparent viscosity evolution profiles of the PAA-H <sub>2</sub> O and PAA-DMF solution with 10 wt% of PAA (c). .....                                                                       | 13 |
| Figure S10. Top-view SEM images of the pristine SiO <sub>x</sub> electrodes prepared with the PAA binder dissolved in the solvent mixture of DMF/H <sub>2</sub> O with different volume ratios of H <sub>2</sub> O/DMF.....                                                                                                                                                     | 14 |
| Figure S11. Digital photographs of pristine SiO <sub>x</sub> electrodes with the PAA binder dissolved in the solvent mixture of H <sub>2</sub> O/DMF with different volume ratios of H <sub>2</sub> O/DMF. ....                                                                                                                                                                 | 15 |
| Figure S12. Top-view SEM images of the pristine SiO <sub>x</sub> /PAA-DMF (a, d, and g) and SiO <sub>x</sub> /PAA-H <sub>2</sub> O electrodes with the pH of 6 (b, e, and h) and 2 (c, f, and i).....                                                                                                                                                                           | 16 |
| Figure S13. Digital photographs of the SiO <sub>x</sub> /PAA-H <sub>2</sub> O (a) and SiO <sub>x</sub> /PAA-DMF electrodes (b) after 100 cycles.....                                                                                                                                                                                                                            | 17 |
| Figure S14. Digital photographs of SiO <sub>x</sub> /PAA-DMF and SiO <sub>x</sub> /PAA-H <sub>2</sub> O electrodes after being folded once, twice, and three times, and their corresponding unfolded states (a-j).....                                                                                                                                                          | 18 |
| Figure S15. Cross-sectional SEM images of the SiO <sub>x</sub> /PAA-H <sub>2</sub> O electrode (a, b, c) and the SiO <sub>x</sub> /PAA-DMF electrode (d, e, f) before cycling.....                                                                                                                                                                                              | 19 |
| Figure S16. The shear rate dependent apparent viscosity evolution profiles of the SiO <sub>x</sub> -PAA-H <sub>2</sub> O/DMF slurries and PAA-H <sub>2</sub> O/DMF solution at similar viscosities. ....                                                                                                                                                                        | 20 |
| Figure S17. Cycling performance of Li  SiO <sub>x</sub> cells at 0.5 C in the voltage range of 0.01 V - 1.5 V prepared with the slurries from water (PAA-H <sub>2</sub> O) or DMF (PAA-DMF) at similar viscosities (a) and load-displacement curves of the SiO <sub>x</sub> /PAA-H <sub>2</sub> O and SiO <sub>x</sub> /PAA-DMF electrodes prepared at this viscosity (b). .... | 21 |
| Table S2. The fractions of different peaks in XPS.....                                                                                                                                                                                                                                                                                                                          | 22 |
| Figure S18. Histogram of the resistivity of the SiO <sub>x</sub> /PAA-DMF and SiO <sub>x</sub> /PAA-H <sub>2</sub> O electrodes.....                                                                                                                                                                                                                                            | 23 |
| Figure S19. Calculation of isotactic, syndiotactic, and atactic PAA single point energies. ....                                                                                                                                                                                                                                                                                 | 24 |

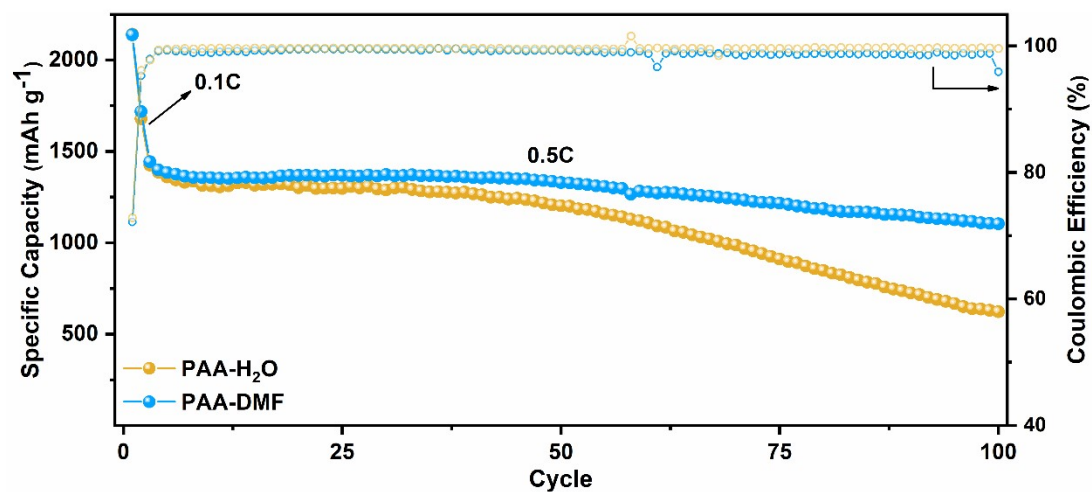

**Figure S1. Cycling performance of Li||SiO<sub>x</sub> cells at 0.5 C in the voltage range of 0.01 V - 1.5 V prepared with the slurries from water (PAA-H<sub>2</sub>O) or DMF (PAA-DMF) with the mass loading density of SiO<sub>x</sub> is 0.8 mg cm<sup>-2</sup>.**

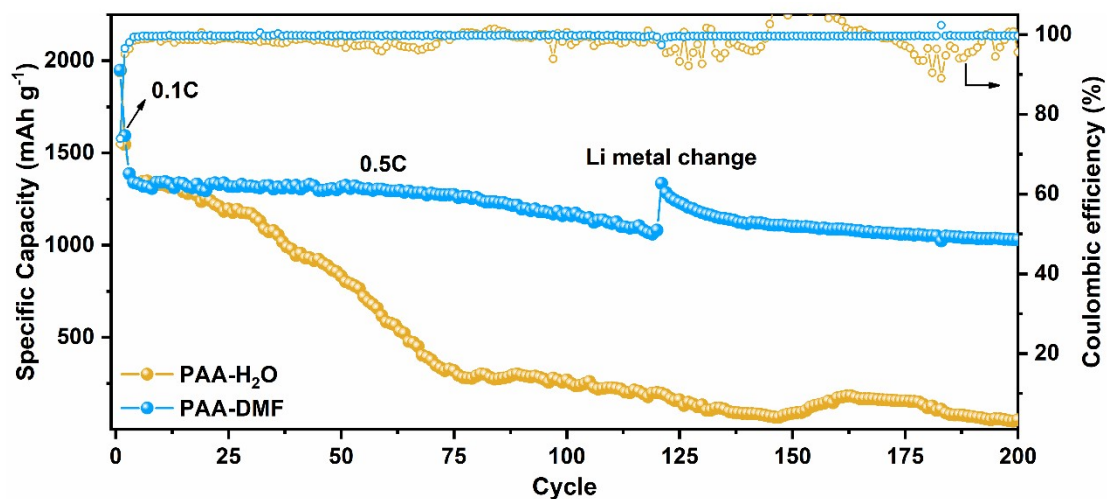

**Figure S2. Cycling performance of Li||SiO<sub>x</sub> cells at 0.5 C in the voltage range of 0.01 V - 1.5 V prepared with the slurries from water (PAA-H<sub>2</sub>O) or DMF (PAA-DMF) with the lithium metal counter electrode is replaced after more than 100 cycles.**

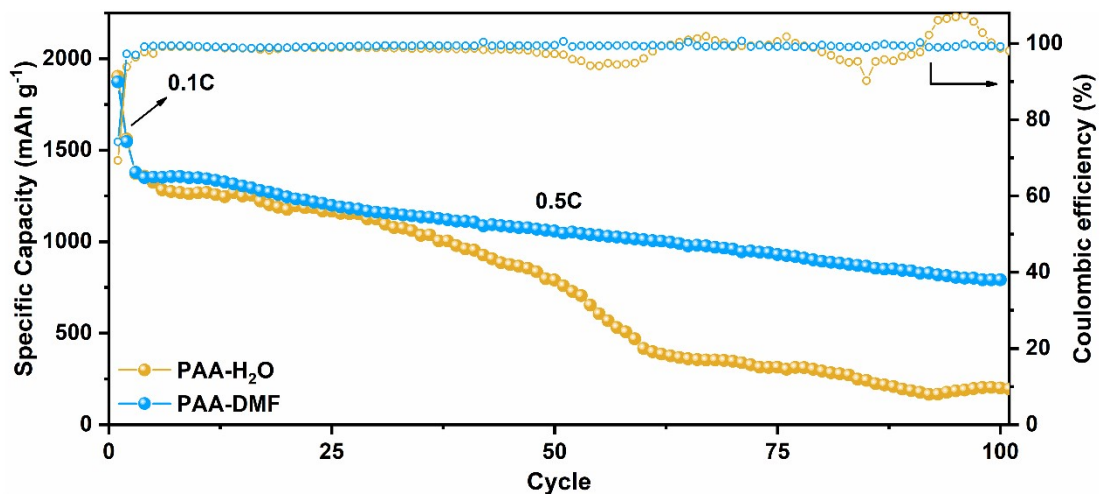

**Figure S3. Cycling performance of Li||SiO<sub>x</sub> cells at 0.5 C in the voltage range of 0.01 V - 1.5 V prepared with the slurries from water (PAA-H<sub>2</sub>O) or DMF (PAA-DMF) and the composition was 80:10:10 (SiO<sub>x</sub>: SP: PAA).**

**Table S1. Discharge specific capacities of the SiO<sub>x</sub>/PAA-DMF and SiO<sub>x</sub>/PAA-H<sub>2</sub>O electrodes at different current densities (1 C = 1500 mA·g<sup>-1</sup>).**

| Discharge Capacity (mAh·g <sup>-1</sup> ) | Current densities |       |       |      |     |       |
|-------------------------------------------|-------------------|-------|-------|------|-----|-------|
|                                           | 0.1 C             | 0.2 C | 0.5 C | 1 C  | 2C  | 0.2 C |
| SiO <sub>x</sub> /PAA-DMF                 | 1892              | 1618  | 1447  | 1094 | 648 | 1555  |
| SiO <sub>x</sub> /PAA-H <sub>2</sub> O    | 1953              | 1506  | 1203  | 881  | 504 | 1329  |

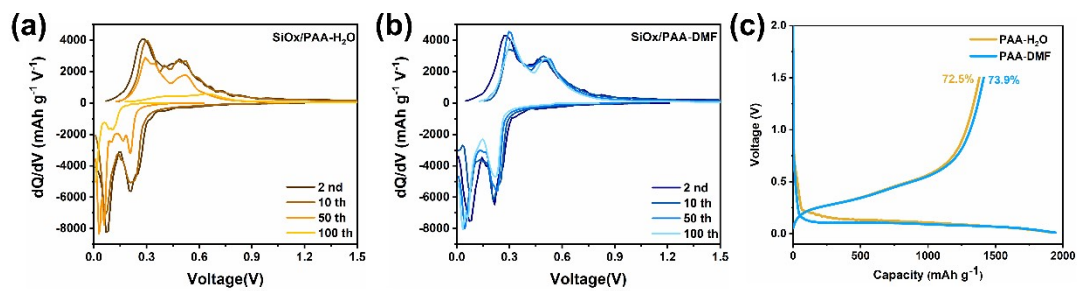

**Figure S4.** The differential capacity plot of the  $\text{SiO}_x/\text{PAA-H}_2\text{O}$  (a) and  $\text{SiO}_x/\text{PAA-DMF}$  electrodes (b) Initial discharge/charge profiles of the  $\text{SiO}_x/\text{PAA-H}_2\text{O}$  and  $\text{SiO}_x/\text{PAA-DMF}$  electrodes under the current density of 0.1 C (c).



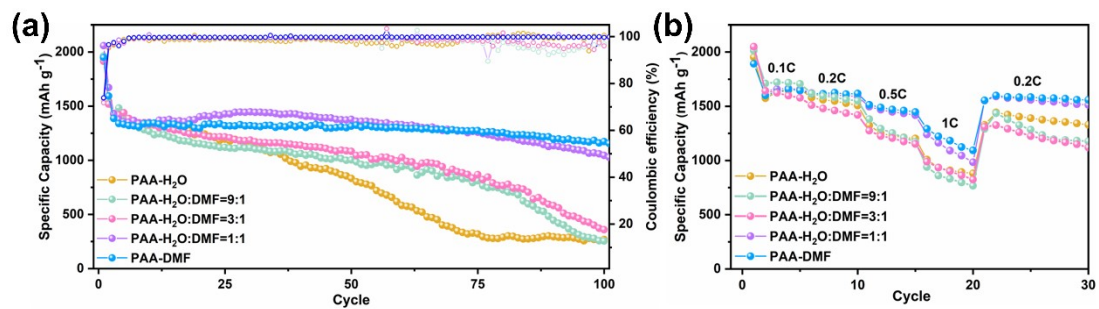

**Figure S5. Cycling performance (a) and rate capacity (b) of the Li||SiO<sub>x</sub> cells at 0.5 C in the voltage range of 0.01 V - 1.5 V with different volume ratios of H<sub>2</sub>O/DMF with the mass loading density of 1.4-1.6 mg cm<sup>-2</sup> with respect to SiO<sub>x</sub>.**

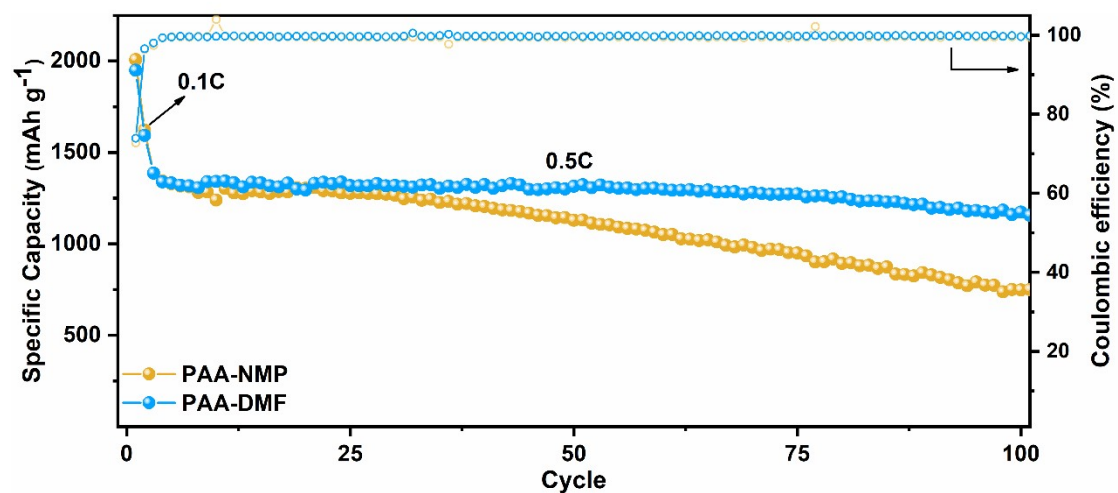

**Figure S6. Cycling performance of Li||SiO<sub>x</sub> cells at 0.5 C in the voltage range of 0.01 V - 1.5 V prepared with the slurries from NMP (PAA-NMP) or DMF (PAA-DMF) (the mass loading density of SiO<sub>x</sub> is 1.4-1.6 mg cm<sup>-2</sup>).**

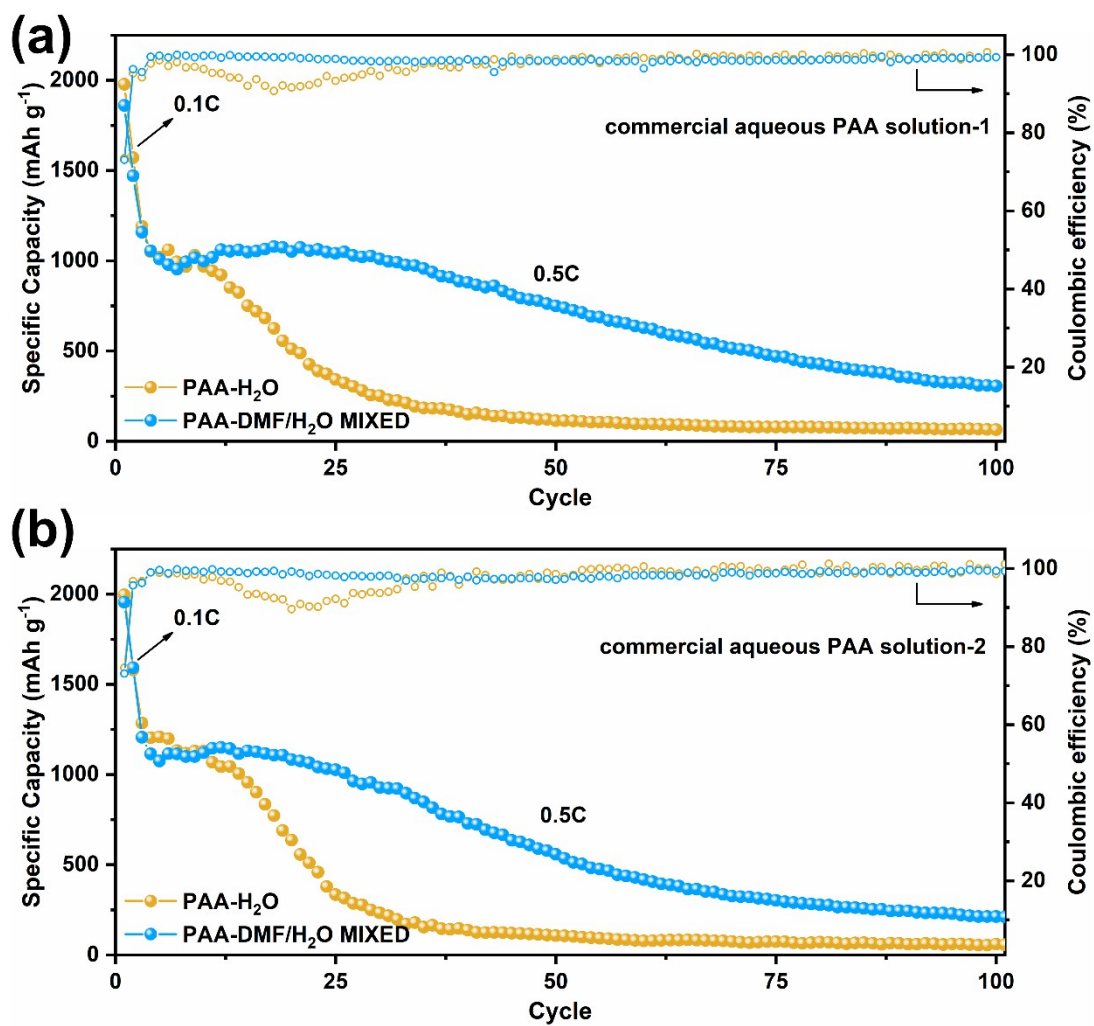

Figure S7. Cycling performance of Li||SiO<sub>x</sub> cells at 0.5 C in the voltage range of 0.01 V - 1.5 V prepared with the slurries from the different molecular weights commercial aqueous PAA solutions or DMF/H<sub>2</sub>O mixed PAA solutions: commercial aqueous PAA solution-1 (a) and commercial aqueous PAA solution-2 (b).

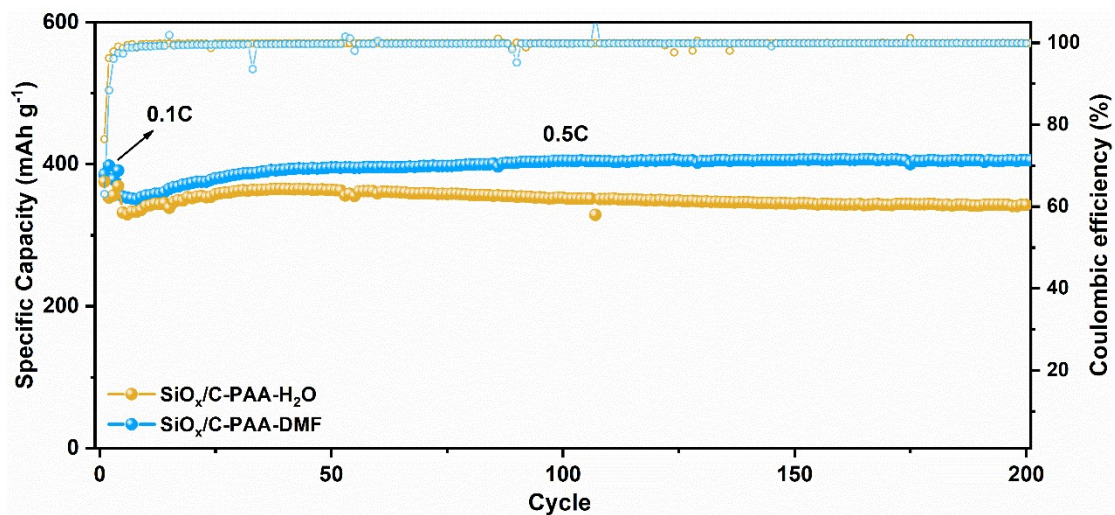

**Figure S8. Cycling performance of Li||SiO<sub>x</sub>/C cells at 0.5 C in the voltage range of 0.01 V - 1.5 V prepared with the slurries from water (PAA-H<sub>2</sub>O) or DMF (PAA-DMF) (1 C=450 mA g<sup>-1</sup>)**

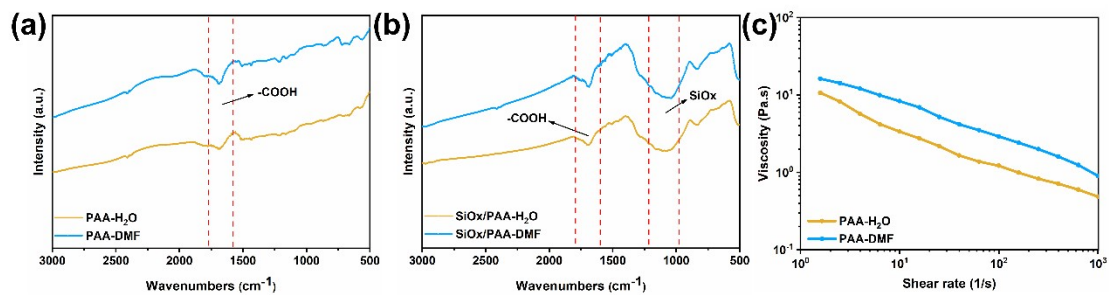

**Figure S9.** FTIR spectra of the PAA-H<sub>2</sub>O and PAA-DMF solution (a). FTIR spectra of the SiO<sub>x</sub>/PAA powder collected after drying treatment of the SiO<sub>x</sub>-PAA-H<sub>2</sub>O and SiO<sub>x</sub>-PAA-DMF slurries (b). The shear rate dependent apparent viscosity evolution profiles of the PAA-H<sub>2</sub>O and PAA-DMF solution with 10 wt% of PAA (c).

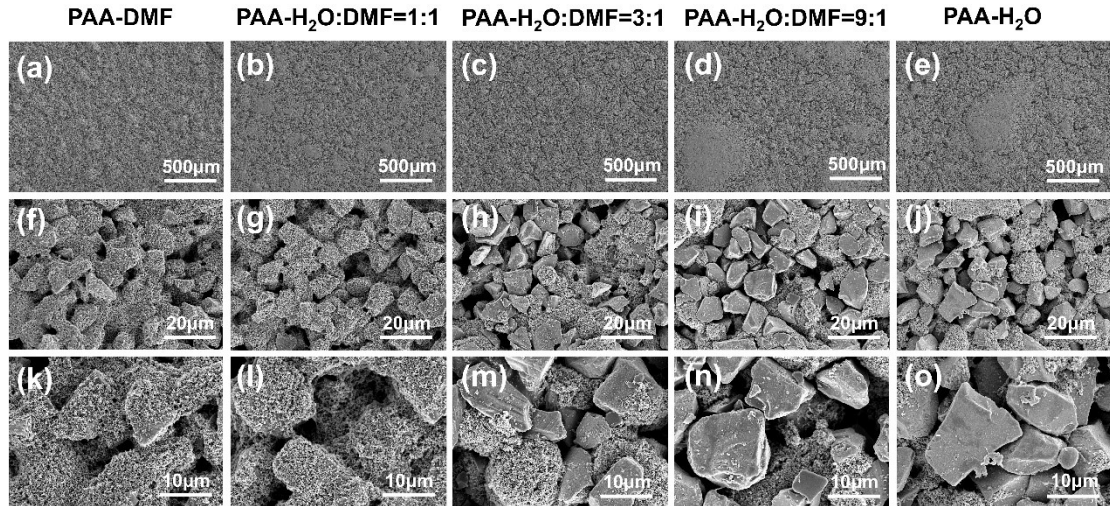

**Figure S10. Top-view SEM images of the pristine SiO<sub>x</sub> electrodes prepared with the PAA binder dissolved in the solvent mixture of DMF/H<sub>2</sub>O with different volume ratios of H<sub>2</sub>O/DMF.**

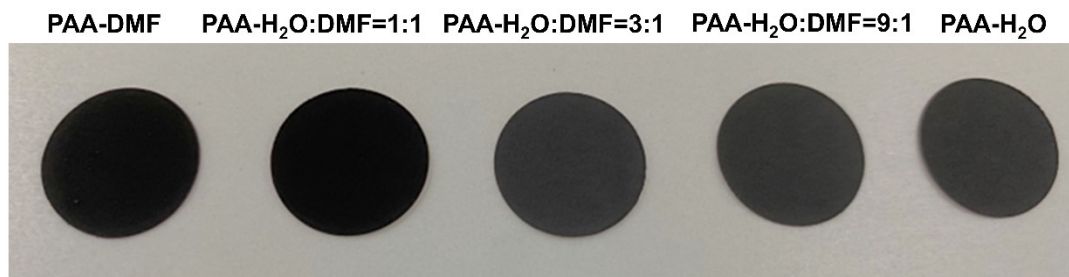

**Figure S11. Digital photographs of pristine SiO<sub>x</sub> electrodes with the PAA binder dissolved in the solvent mixture of H<sub>2</sub>O/DMF with different volume ratios of H<sub>2</sub>O/DMF.**

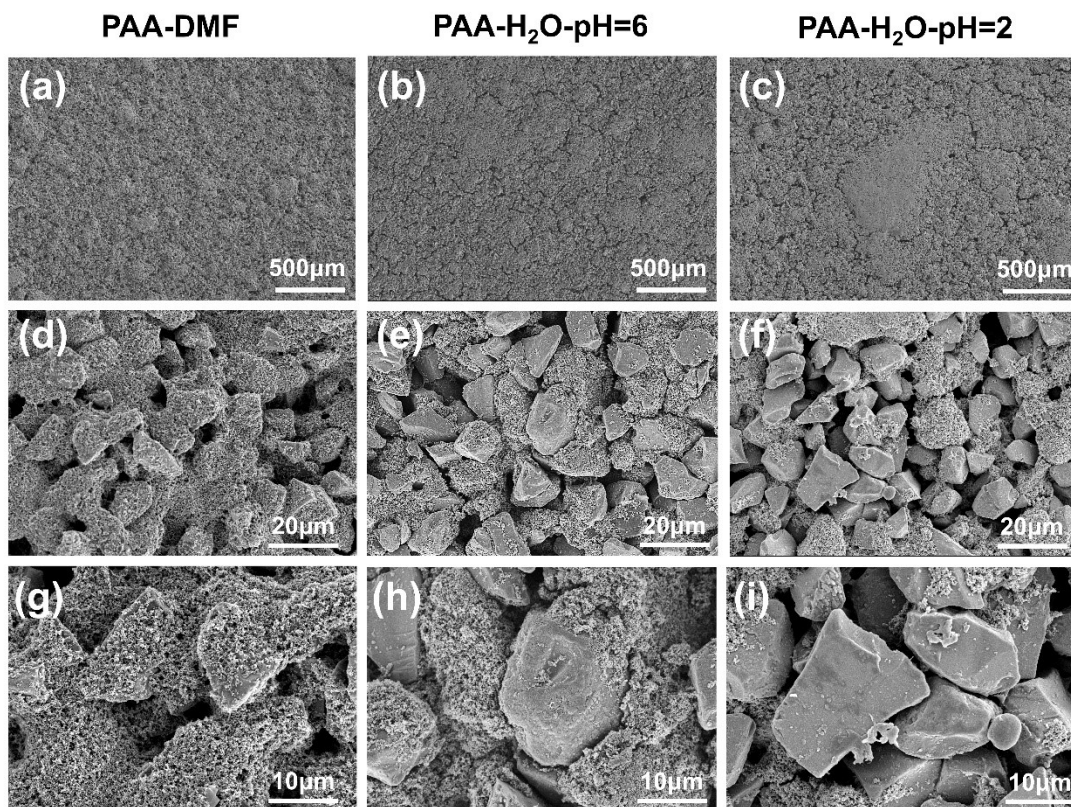

**Figure S12.** Top-view SEM images of the pristine SiO<sub>x</sub>/PAA-DMF (a, d, and g) and SiO<sub>x</sub>/PAA-H<sub>2</sub>O electrodes with the pH of 6 (b, e, and h) and 2 (c, f, and i).



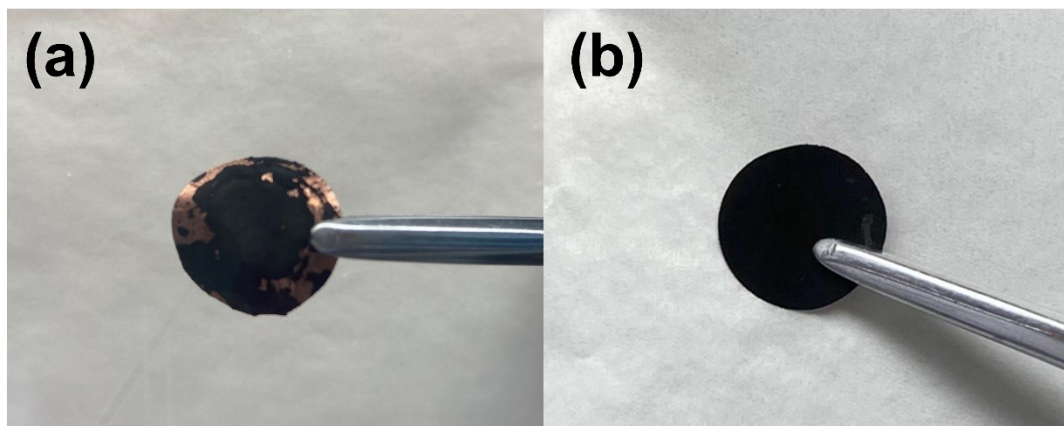

**Figure S13. Digital photographs of the  $\text{SiO}_x/\text{PAA-H}_2\text{O}$  (a) and  $\text{SiO}_x/\text{PAA-DMF}$  electrodes (b) after 100 cycles.**

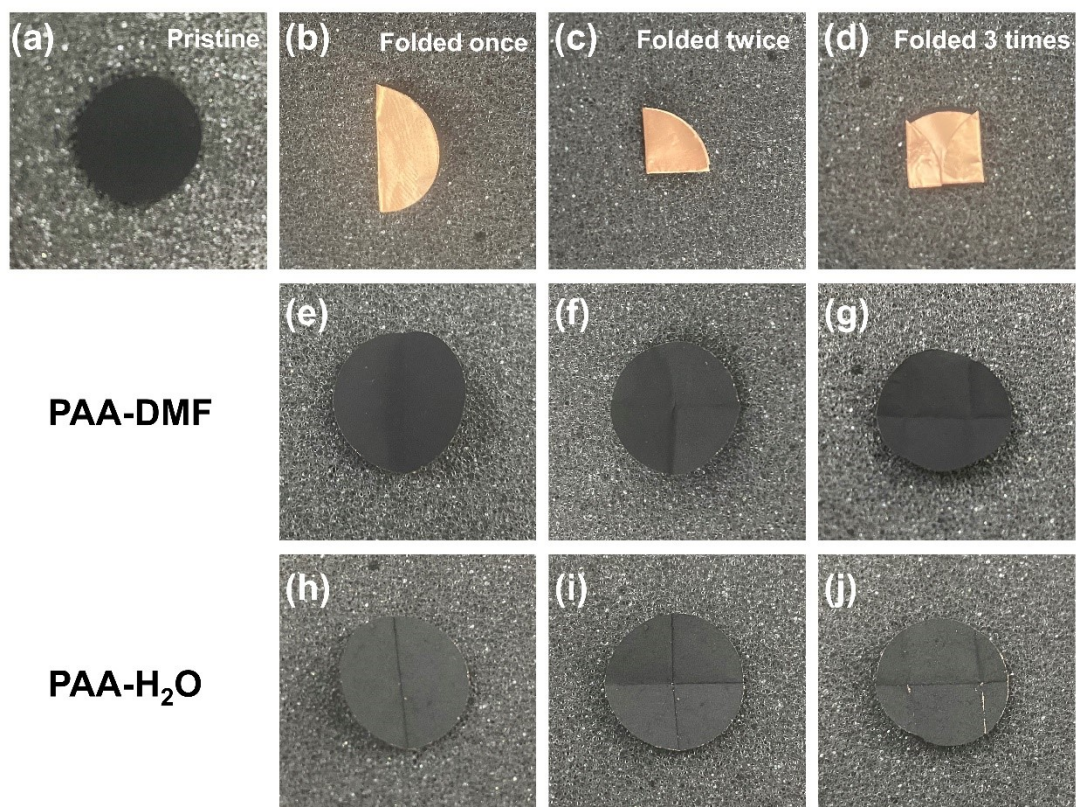

**Figure S14. Digital photographs of SiO<sub>x</sub>/PAA-DMF and SiO<sub>x</sub>/PAA-H<sub>2</sub>O electrodes after being folded once, twice, and three times, and their corresponding unfolded states (a-j).**

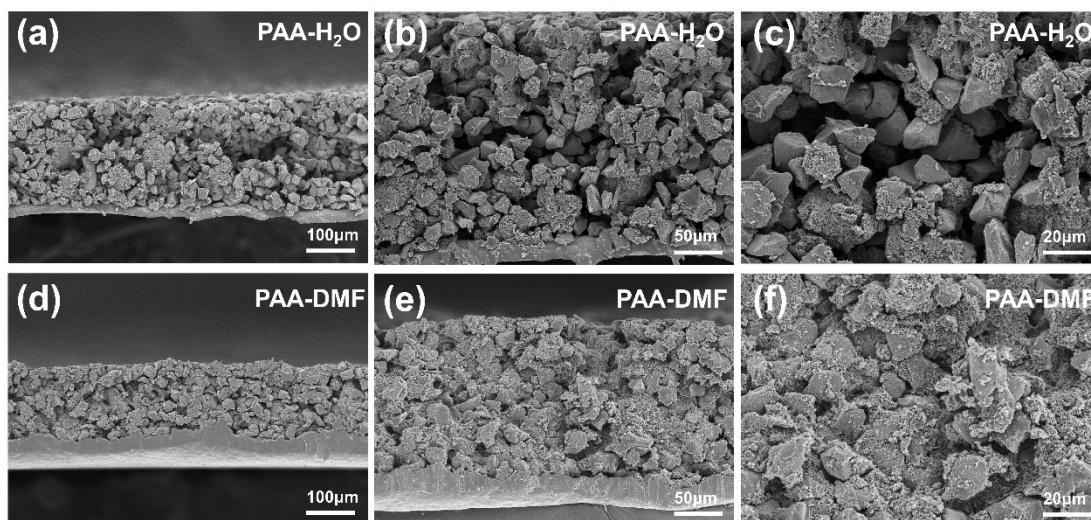

**Figure S15. Cross-sectional SEM images of the SiO<sub>x</sub>/PAA-H<sub>2</sub>O electrode (a, b, c) and the SiO<sub>x</sub>/PAA-DMF electrode (d, e, f) before cycling.**

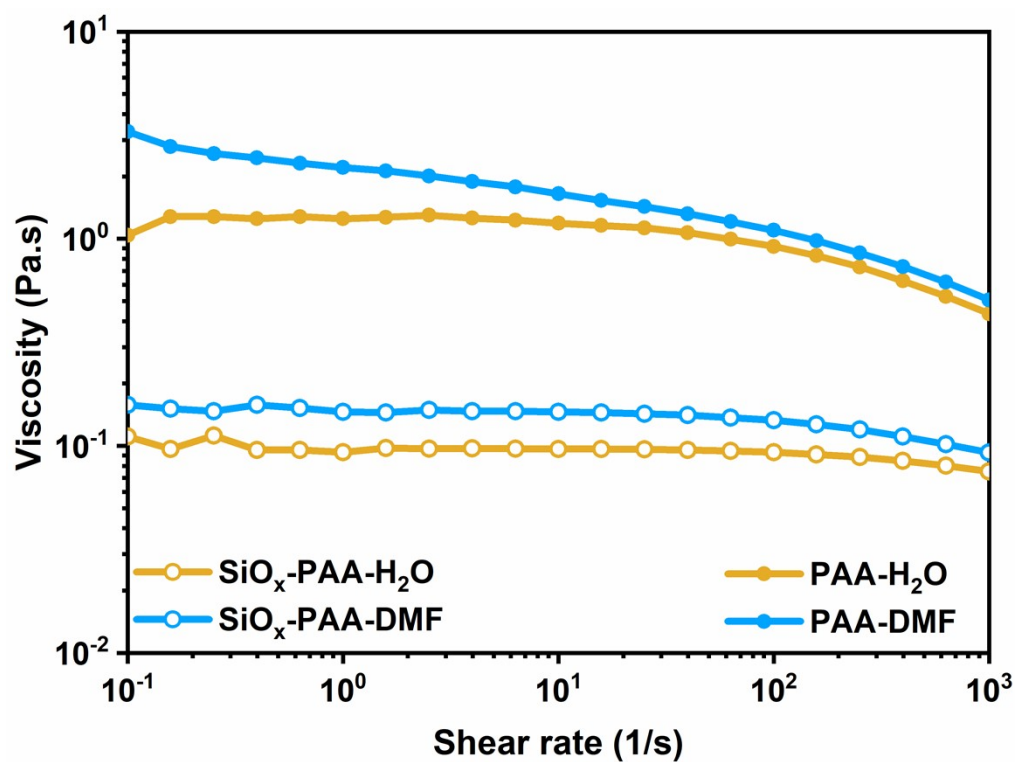

**Figure S16.** The shear rate dependent apparent viscosity evolution profiles of the SiO<sub>x</sub>-PAA-H<sub>2</sub>O/DMF slurries and PAA-H<sub>2</sub>O/DMF solution at similar viscosities.

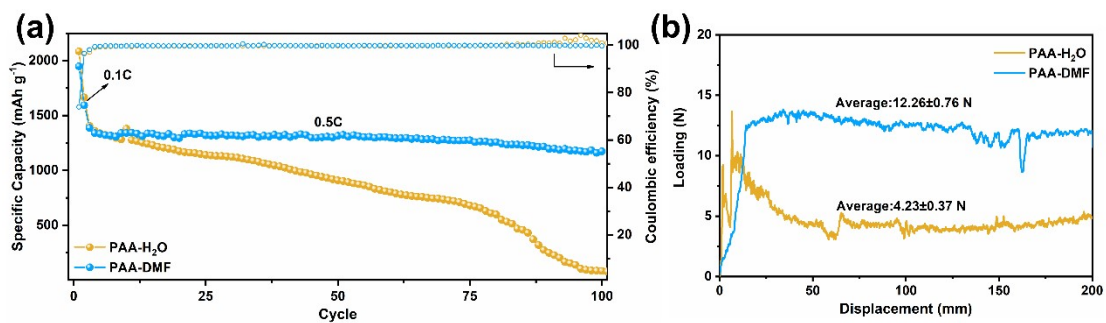

**Figure S17. Cycling performance of Li||SiO<sub>x</sub> cells at 0.5 C in the voltage range of 0.01 V - 1.5 V prepared with the slurries from water (PAA-H<sub>2</sub>O) or DMF (PAA-DMF) at similar viscosities (a) and load-displacement curves of the SiO<sub>x</sub>/PAA-H<sub>2</sub>O and SiO<sub>x</sub>/PAA-DMF electrodes prepared at this viscosity (b).**

**Table S2. The fractions of different peaks in XPS.**

| %                                              | C 1s     |       |      |                                 | O 1s  |                                 |                   | F 1s                            |       |
|------------------------------------------------|----------|-------|------|---------------------------------|-------|---------------------------------|-------------------|---------------------------------|-------|
|                                                | C-C/ C-H | C-O   | C=O  | Li <sub>2</sub> CO <sub>3</sub> | C-O   | Li <sub>2</sub> CO <sub>3</sub> | Li <sub>2</sub> O | Li <sub>x</sub> PF <sub>y</sub> | LiF   |
| <b>SiO<sub>x</sub>/PAA<br/>-DMF</b>            | 50.51    | 32.17 | 7.06 | 10.26                           | 27.34 | 67.94                           | 4.72              | 79.42                           | 20.58 |
| <b>SiO<sub>x</sub>/PAA<br/>-H<sub>2</sub>O</b> | 44.16    | 19.75 | 6.45 | 29.64                           | 43.22 | 55.25                           | 1.53              | 89.03                           | 10.97 |

The data for the different peak fractions shows that the SiO<sub>x</sub>/PAA-DMF electrode produces less Li<sub>2</sub>CO<sub>3</sub> and more LiF than the SiO<sub>x</sub>/PAA-H<sub>2</sub>O electrode. The SiO<sub>x</sub>/PAA-DMF electrode forms a stable SEI layer, which helps to inhibit electrolyte decomposition, and the LiF-rich SEI layer also has a higher shear modulus, which better inhibits volume expansion during cycling.

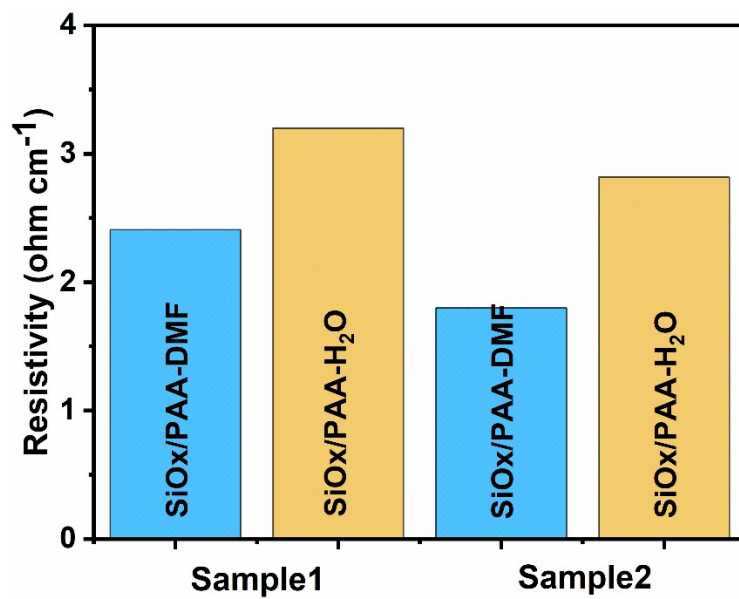

Figure S18. Histogram of the resistivity of the SiO<sub>x</sub>/PAA-DMF and SiO<sub>x</sub>/PAA-H<sub>2</sub>O electrodes.

| DP | Isotactic(eV)                                                                               | Syndiotactic (eV)                                                                           | Atactic (eV)                                                                                  |
|----|---------------------------------------------------------------------------------------------|---------------------------------------------------------------------------------------------|-----------------------------------------------------------------------------------------------|
| 1  | 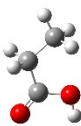 -7305.64  | /                                                                                           | /                                                                                             |
| 2  |  -14571.61 |  -14571.47 |  -14571.55 |
| 3  |  -21851.64 |  -21851.61 |  -21851.62 |
| 4  |  -29124.50 |  -29123.95 |  -29124.22 |

**Figure S19. Calculation of isotactic, syndiotactic, and atactic PAA single point energies.**

The results for the single point energies of isotactic, syndiotactic, and atactic PAA show that the energies of the three are close to each other, with the isotactic PAA having lower single point energies at different degrees of polymerization, the atactic PAA being in the middle and the syndiotactic being the highest. In this paper, the lower energy isotactic PAA was chosen for the calculation of the subsequent solvent molecular binding energy.
